# Supplementary material
Source: publisher figshare collection journal article supplement (https://acs.figshare.com/ndownloader/files/5058868)

## SUPPORTING INFORMATION

**Title:** Remarkable findings concerning PBDEs in the terrestrial top-predator red fox (*Vulpes vulpes*)

**Authors:** Stefan Voorspoels, Adrian Covaci, Peter Lepom, Sophie Escutenaire, Paul Schepens

Median levels (ng/g lipid weight) of PCB congeners and organochlorine pesticides in adipose, muscle and liver of red foxes from Belgium are presented in Figures SI-1 and SI-2, respectively.

**Figure SI-1.** PCB-profiles in adipose tissue, muscle and liver of red foxes from Belgium. Only 5 congeners contribute each more than 5 % to the total load. All other congeners contributed less than 2 % each.

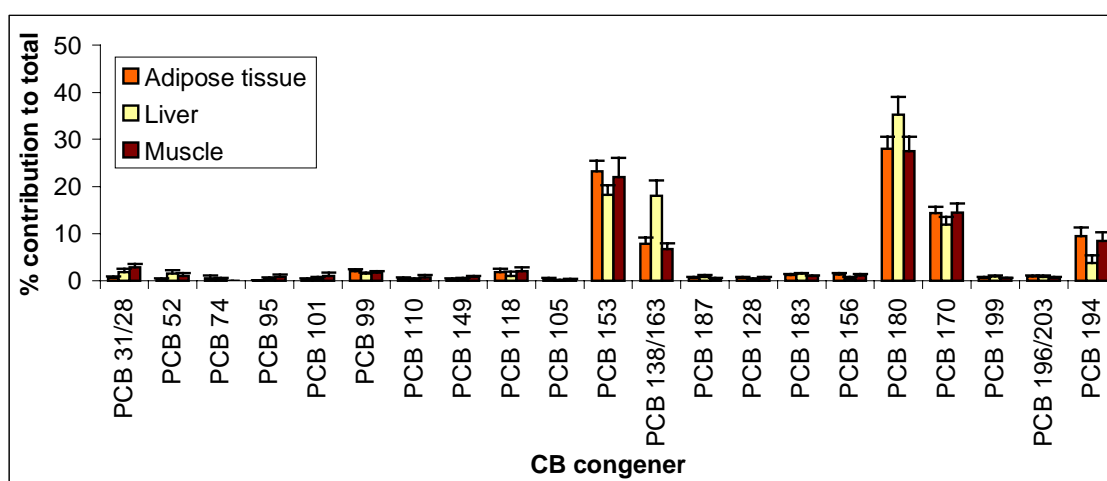

**Figure SI-2.** Median levels of organochlorine pesticides in adipose, muscle and liver tissues of red foxes from Belgium. The metabolic end-product oxychlordan (OxC) is the dominant product in all tissues. Highest lipid-normalized levels were seen in liver.

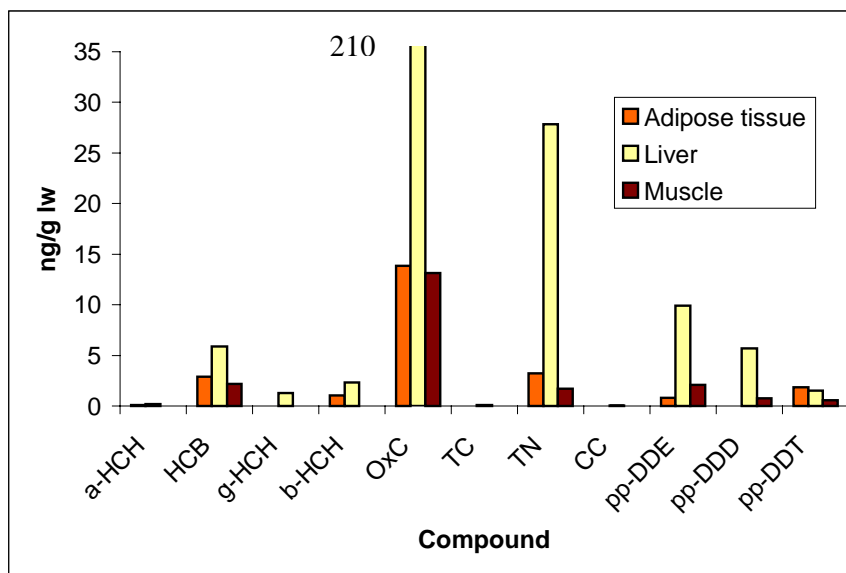

Supplement: Supplementary file 1 [file 5058868]
